# Supplementary material for: Long-term humoral and cellular immunity after primary SARS-CoV-2 infection: a 20-month longitudinal study
Source: PubMed Central journal article supplement (PMC10652616; doi:10.1186/s12865-023-00583-y), 2023-11-16

**(a)**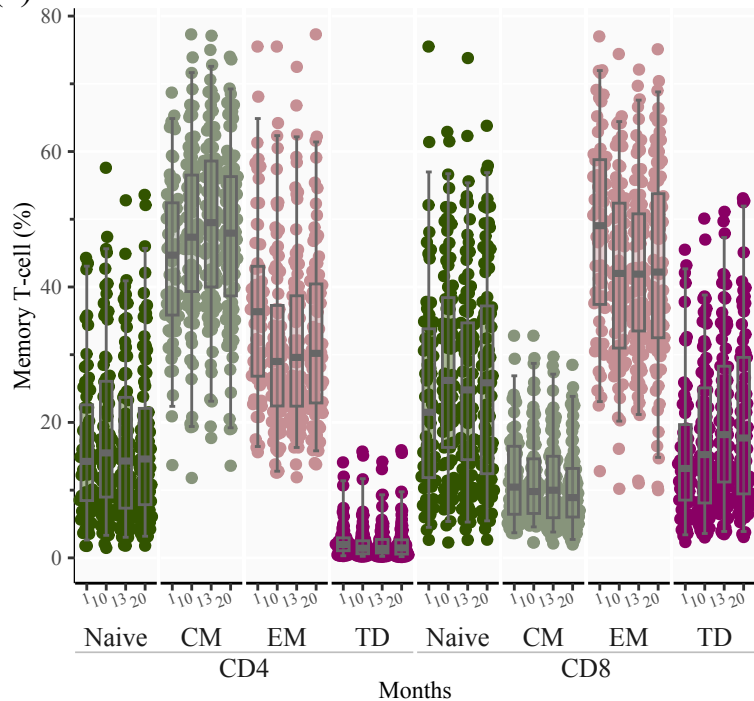**(b)**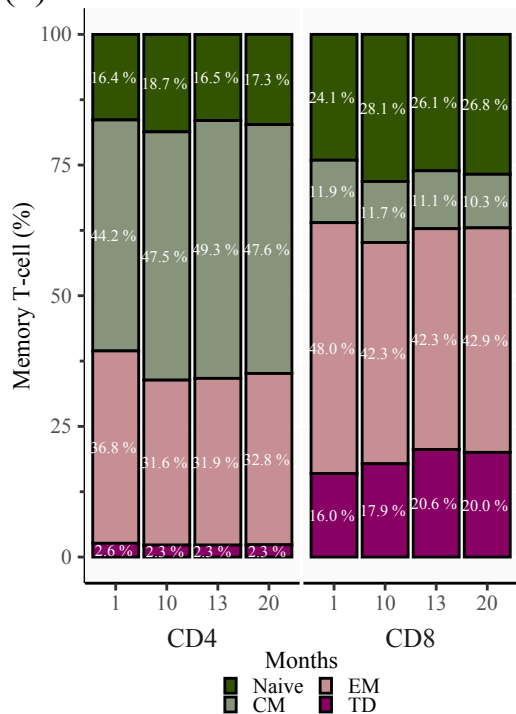

Supplement: 12865_2023_583_MOESM1_ESM.pdf [file 12865_2023_583_MOESM1_ESM.pdf]
