# Supplementary material for: Long-term humoral and cellular immunity after primary SARS-CoV-2 infection: a 20-month longitudinal study
Source: PubMed Central journal article supplement (PMC10652616; doi:10.1186/s12865-023-00583-y), 2023-11-16
Supplement: 12865_2023_583_MOESM2_ESM.pdf [file 12865_2023_583_MOESM2_ESM.pdf]

(a)

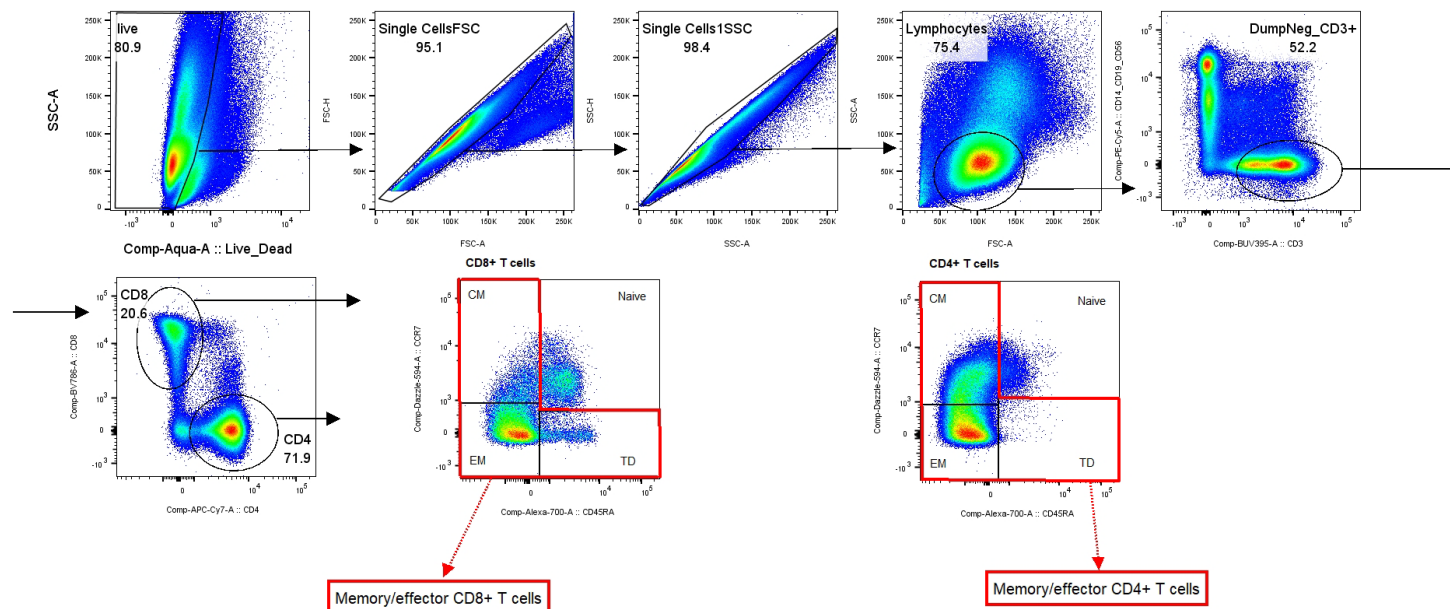

(b)

DMSO (NEG)

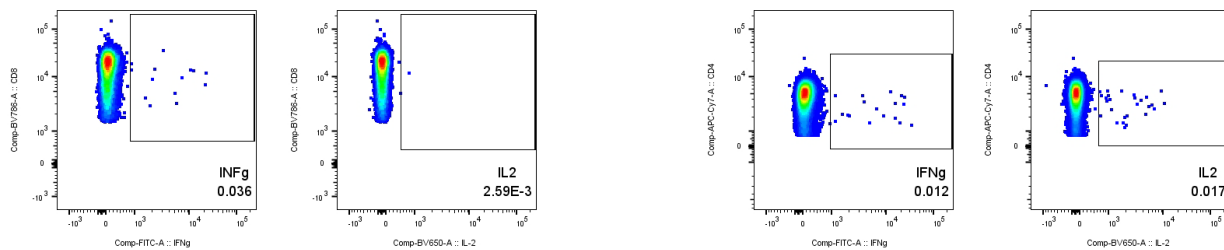

(c)

Spike peptide  
small pool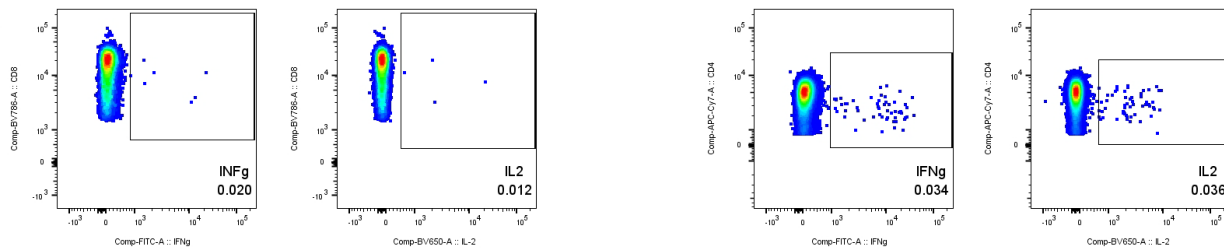Non-spike  
peptide pool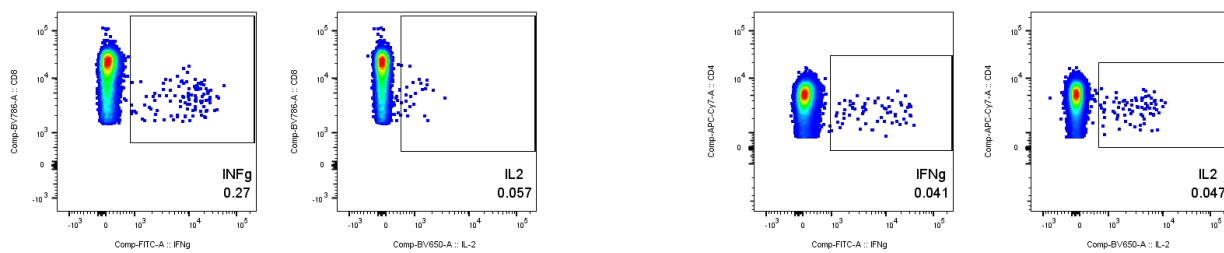

(d)

Memory/effector CD8+ T cells: Boolean combination gates

|               | IFN $\gamma$ +IL2+ | IFN $\gamma$ -IL2+ | IFN $\gamma$ +IL2- |
|---------------|--------------------|--------------------|--------------------|
| DMSO          | 0-003              | 0-00               | 0-034              |
| Spike - small | 0-006              | 0-006              | 0-015              |
| Non - spike   | 0-052              | 0-005              | 0-210              |

Memory/effector CD4+ T cells: Boolean combination gates

|               | IFN $\gamma$ +IL2+ | IFN $\gamma$ -IL2+ | IFN $\gamma$ +IL2- |
|---------------|--------------------|--------------------|--------------------|
| DMSO          | 0-006              | 0-011              | 0-006              |
| Spike - small | 0-02               | 0-016              | 0-014              |
| Non - spike   | 0-024              | 0-024              | 0-018              |
