# Supplementary material for: Long-term humoral and cellular immunity after primary SARS-CoV-2 infection: a 20-month longitudinal study
Source: PubMed Central journal article supplement (PMC10652616; doi:10.1186/s12865-023-00583-y), 2023-11-16
Supplement: 12865_2023_583_MOESM5_ESM.pdf [file 12865_2023_583_MOESM5_ESM.pdf]

(a)

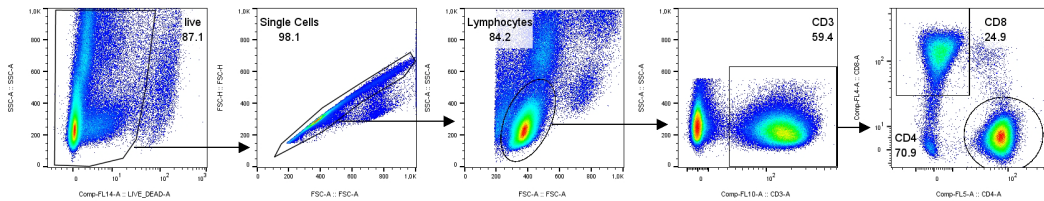

(b)

DMSO (NEG)

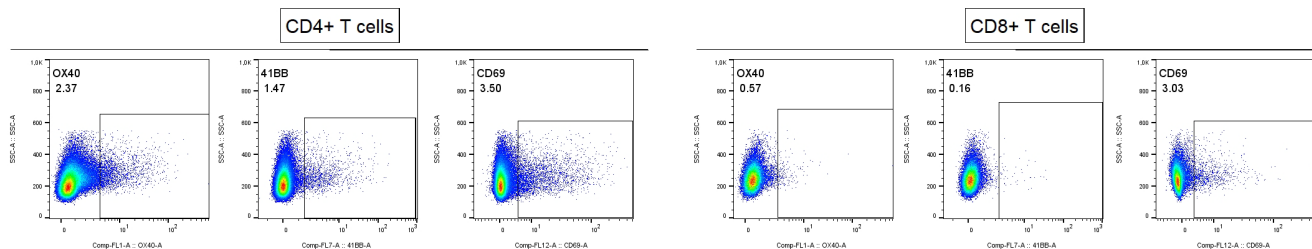

(c)

Spike peptide large pool

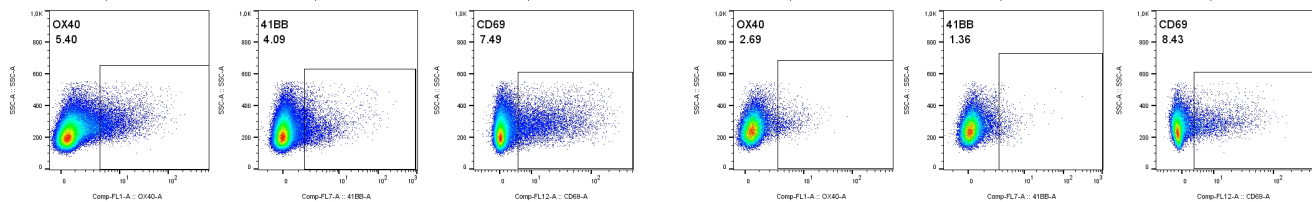

Spike peptide small pool

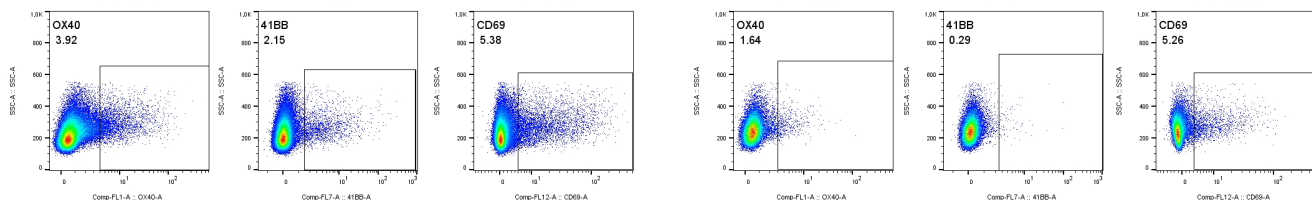

Non-spike peptide pool

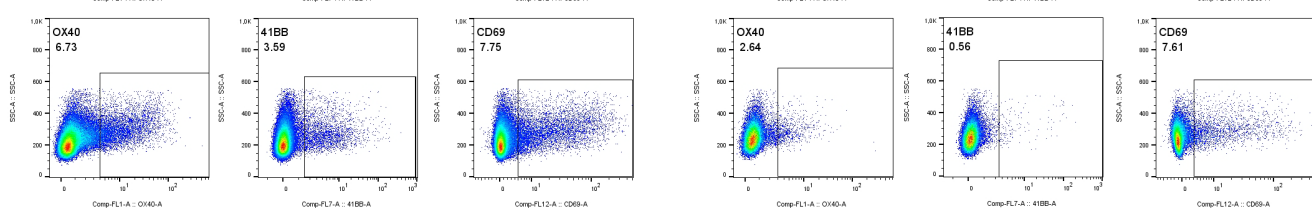

(d)

CD4+ T cells: Boolean combination gates

|               | 41BB+CD69+<br>OX40+ | 41BB+CD69+<br>OX40- | 41BB+CD69-<br>OX40+ | 41BB-CD69+<br>OX40+ |
|---------------|---------------------|---------------------|---------------------|---------------------|
| DMSO          | 0-25                | 0-065               | 0-35                | 0-76                |
| Spike - large | 0-53                | 0-2                 | 0-75                | 2-25                |
| Spike - small | 0-39                | 0-076               | 0-65                | 1-51                |
| Non - spike   | 0-86                | 0-13                | 1-13                | 2-91                |

CD8+ T cells: Boolean combination gates

|               | 41BB+CD69+<br>OX40+ | 41BB+CD69+<br>OX40- | 41BB+CD69-<br>OX40+ | 41BB-CD69+<br>OX40+ |
|---------------|---------------------|---------------------|---------------------|---------------------|
| DMSO          | 0-019               | 0-052               | 0-0032              | 0-071               |
| Spike - large | 0-091               | 0-39                | 0-038               | 0-93                |
| Spike - small | 0-041               | 0-14                | 0-01                | 0-45                |
| Non - spike   | 0-11                | 0-31                | 0-0036              | 0-8                 |
